# Supplementary material
Source: Springer Nature journal article supplement (https://www.springermedizin.de/resource/supplementary/12936_2013_2832_MOESM1_ESM.pdf/9544308)

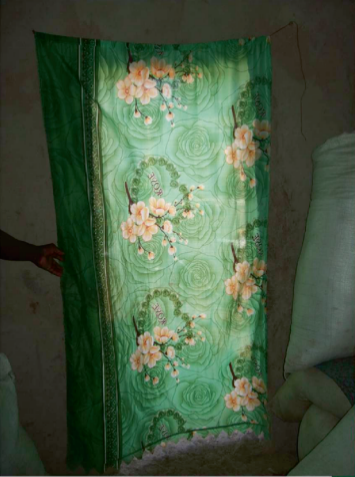

Curtain blocking the door

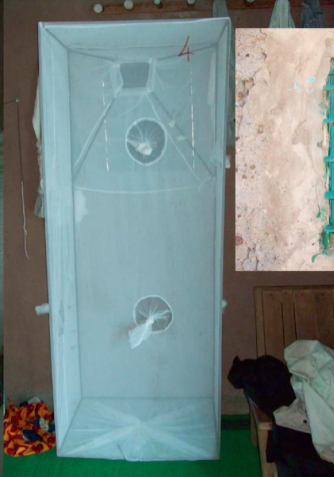

Trap at the window, inside view

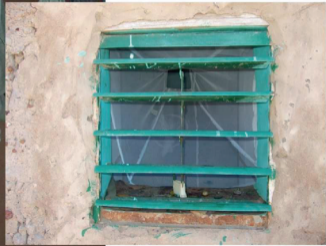

Trap at the window, outside view

Supplement: MOESM1 [file 9544308]
